# Supplementary material for: The Relationship between Character Traits and In Vivo Cerebral Serotonin Transporter Availability in Healthy Subjects: A High-Resolution PET Study with C-11 DASB
Source: MDPI journal article supplement (doi:10.3390/ph16050759), 2023-05-18
Supplement: s1 [file s1]

## Supplementary Materials

**Supplementary Table S1.** Comparison between males and females for raw scores of three character traits

| Three character scales of TCI | Male<br>(n = 12) | Female<br>(n = 12) | <i>p</i> value |
|-------------------------------|------------------|--------------------|----------------|
| Self-directedness             | 58.2 ± 6.9       | 51.3 ± 7.1         | 0.024*         |
| Cooperativeness               | 59.1 ± 8.4       | 59.9 ± 7.7         | 0.803          |
| Self-transcendence            | 20.5 ± 13.7      | 24.9 ± 13.2        | 0.430          |

The raw scores of three character traits were presented as mean ± standard deviation, and *p* values were obtained using independent samples *t*-tests. In this table, an asterisk indicates statistical significance at  $p < 0.05$ . TCI, Temperament and Character Inventory.

**Supplementary Table S2.** Comparison between males and females for regional [<sup>11</sup>C]DASB BP<sub>ND</sub> values

| Brain region  |                                             | Male<br>(n = 12) | Female<br>(n = 12) | <i>p</i> value |
|---------------|---------------------------------------------|------------------|--------------------|----------------|
| Frontal lobe  | Rt. superior frontal gyrus                  | 0.28 ± 0.05      | 0.26 ± 0.04        | 0.218          |
|               | Lt. superior frontal gyrus                  | 0.26 ± 0.05      | 0.24 ± 0.04        | 0.136          |
|               | Rt. middle frontal gyrus                    | 0.28 ± 0.06      | 0.26 ± 0.05        | 0.498          |
|               | Lt. middle frontal gyrus                    | 0.28 ± 0.05      | 0.27 ± 0.05        | 0.601          |
|               | Rt. superior frontal gyrus (medial)         | 0.26 ± 0.04      | 0.26 ± 0.04        | 0.870          |
|               | Lt. superior frontal gyrus (medial)         | 0.25 ± 0.05      | 0.23 ± 0.03        | 0.411          |
|               | Rt. superior frontal gyrus (orbital part)   | 0.32 ± 0.05      | 0.31 ± 0.06        | 0.530          |
|               | Lt. superior frontal gyrus (orbital part)   | 0.30 ± 0.06      | 0.25 ± 0.05        | 0.049*         |
|               | Rt. superior frontal gyrus (medial orbital) | 0.38 ± 0.06      | 0.38 ± 0.06        | 0.921          |
|               | Lt. superior frontal gyrus (medial orbital) | 0.34 ± 0.09      | 0.34 ± 0.04        | 0.909          |
|               | Rt. middle frontal gyrus (orbital part)     | 0.29 ± 0.07      | 0.26 ± 0.05        | 0.163          |
|               | Lt. middle frontal gyrus (orbital part)     | 0.25 ± 0.04      | 0.23 ± 0.05        | 0.284          |
|               | Rt. inferior frontal gyrus (orbital part)   | 0.30 ± 0.07      | 0.30 ± 0.06        | 0.813          |
|               | Lt. inferior frontal gyrus (orbital part)   | 0.29 ± 0.04      | 0.30 ± 0.06        | 0.540          |
|               | Rt. olfactory cortex                        | 1.08 ± 0.22      | 0.96 ± 0.15        | 0.153          |
|               | Lt. olfactory cortex                        | 1.02 ± 0.20      | 0.94 ± 0.14        | 0.281          |
| Temporal lobe | Rt. superior temporal gyrus                 | 0.35 ± 0.03      | 0.33 ± 0.04        | 0.082          |
|               | Lt. superior temporal gyrus                 | 0.47 ± 0.05      | 0.44 ± 0.07        | 0.294          |
|               | Rt. middle temporal gyrus                   | 0.31 ± 0.04      | 0.26 ± 0.03        | 0.001**        |
|               | Lt. middle temporal gyrus                   | 0.41 ± 0.06      | 0.39 ± 0.05        | 0.396          |

|                         |                                             |                 |                 |                    |
|-------------------------|---------------------------------------------|-----------------|-----------------|--------------------|
|                         | Rt. inferior temporal gyrus                 | $0.36 \pm 0.05$ | $0.29 \pm 0.04$ | $<0.001^{\dagger}$ |
|                         | Lt. inferior temporal gyrus                 | $0.43 \pm 0.04$ | $0.39 \pm 0.06$ | 0.062              |
| Parietal lobe           | Rt. superior parietal gyrus                 | $0.24 \pm 0.03$ | $0.22 \pm 0.05$ | 0.210              |
|                         | Lt. superior parietal gyrus                 | $0.23 \pm 0.04$ | $0.23 \pm 0.05$ | 0.832              |
|                         | Rt. inferior parietal gyrus                 | $0.22 \pm 0.04$ | $0.22 \pm 0.04$ | 0.700              |
|                         | Lt. inferior parietal gyrus                 | $0.28 \pm 0.05$ | $0.31 \pm 0.06$ | 0.141              |
| Occipital lobe          | Rt. middle occipital gyrus                  | $0.28 \pm 0.05$ | $0.24 \pm 0.05$ | 0.108              |
|                         | Lt. middle occipital gyrus                  | $0.32 \pm 0.05$ | $0.31 \pm 0.06$ | 0.754              |
| Limbic lobe             | Rt. anterior cingulate & paracingulate gyri | $0.52 \pm 0.06$ | $0.48 \pm 0.07$ | 0.139              |
|                         | Lt. anterior cingulate & paracingulate gyri | $0.52 \pm 0.09$ | $0.50 \pm 0.05$ | 0.472              |
|                         | Rt. median cingulate & paracingulate gyri   | $0.55 \pm 0.05$ | $0.51 \pm 0.04$ | 0.089              |
|                         | Lt. median cingulate & paracingulate gyri   | $0.55 \pm 0.06$ | $0.51 \pm 0.04$ | 0.065              |
|                         | Rt. posterior cingulate gyrus               | $0.37 \pm 0.08$ | $0.33 \pm 0.06$ | 0.180              |
|                         | Lt. posterior cingulate gyrus               | $0.42 \pm 0.06$ | $0.41 \pm 0.07$ | 0.835              |
|                         | Rt. hippocampus                             | $0.89 \pm 0.13$ | $0.74 \pm 0.13$ | 0.014*             |
|                         | Lt. hippocampus                             | $1.02 \pm 0.09$ | $0.89 \pm 0.16$ | 0.027*             |
| Rt. Insula              |                                             | $0.63 \pm 0.08$ | $0.59 \pm 0.09$ | 0.374              |
| Lt. Insula              |                                             | $0.71 \pm 0.08$ | $0.63 \pm 0.11$ | 0.059              |
| Subcortical gray nuclei | Rt. amygdala                                | $1.57 \pm 0.27$ | $1.38 \pm 0.23$ | 0.074              |
|                         | Lt. amygdala                                | $1.92 \pm 0.35$ | $1.84 \pm 0.29$ | 0.560              |
|                         | Rt. caudate nucleus                         | $1.17 \pm 0.36$ | $1.11 \pm 0.26$ | 0.606              |
|                         | Lt. caudate nucleus                         | $1.25 \pm 0.39$ | $1.10 \pm 0.25$ | 0.278              |

|           |                       |             |             |       |
|-----------|-----------------------|-------------|-------------|-------|
|           | Rt. putamen           | 1.40 ± 0.27 | 1.22 ± 0.20 | 0.079 |
|           | Lt. putamen           | 1.51 ± 0.38 | 1.40 ± 0.13 | 0.343 |
|           | Rt. nucleus accumbens | 1.75 ± 0.31 | 1.59 ± 0.28 | 0.217 |
|           | Lt. nucleus accumbens | 1.64 ± 0.35 | 1.44 ± 0.24 | 0.125 |
|           | Rt. globus pallidus   | 0.82 ± 0.28 | 0.82 ± 0.23 | 0.982 |
|           | Lt. globus pallidus   | 0.57 ± 0.22 | 0.62 ± 0.15 | 0.557 |
|           | Rt. thalamus          | 1.62 ± 0.29 | 1.72 ± 0.30 | 0.426 |
|           | Lt. thalamus          | 1.57 ± 0.23 | 1.62 ± 0.28 | 0.625 |
| Brainstem | Dorsal raphe nucleus  | 1.70 ± 1.08 | 1.35 ± 0.40 | 0.312 |
|           | Median raphe nucleus  | 1.95 ± 1.20 | 2.16 ± 1.52 | 0.716 |

[<sup>11</sup>C]DASB BP<sub>ND</sub> values were indicated as mean ± standard deviation, and *p* values were calculated using independent samples *t*-tests. In these analysis, the statistical significance is indicated as *p* < 0.05\*, *p* < 0.01\*\*, and *p* < 0.001<sup>†</sup>. BP<sub>ND</sub>, binding potential; Rt, right; Lt, left.

**Supplementary Table S3.** Significant correlations between the character traits and [<sup>11</sup>C]DASB BP<sub>ND</sub> in the brain regions excluded from the ROIs

| Brain region            |                                              | [ <sup>11</sup> C]DASB<br>BP <sub>ND</sub> value<br>(Mean ± SD) | Correlation coefficient ( <i>p</i> value) |                 |                    |
|-------------------------|----------------------------------------------|-----------------------------------------------------------------|-------------------------------------------|-----------------|--------------------|
|                         |                                              |                                                                 | Self-directedness                         | Cooperativeness | Self-transcendence |
| Central region          | Rt. postcentral gyrus                        | 0.28 ± 0.04                                                     | 0.154 (0.494)                             | -0.095 (0.674)  | -0.488 (0.021)*    |
| Parietal lobe           | Lt. angular gyrus                            | 0.30 ± 0.05                                                     | 0.429 (0.046)*                            | 0.066 (0.771)   | -0.014 (0.950)     |
|                         | Rt. supramarginal gyrus                      | 0.25 ± 0.05                                                     | -0.056 (0.805)                            | 0.146 (0.516)   | -0.441 (0.040)*    |
|                         | Lt. supramarginal gyrus                      | 0.37 ± 0.06                                                     | 0.447 (0.037)*                            | 0.200 (0.373)   | 0.208 (0.352)      |
| Occipital lobe          | Lt. inferior occipital gyrus                 | 0.31 ± 0.06                                                     | 0.498 (0.018)*                            | -0.128 (0.571)  | 0.044 (0.845)      |
|                         | Rt. calcarine fissure and surrounding cortex | 0.51 ± 0.09                                                     | 0.591 (0.004)**                           | 0.154 (0.495)   | 0.261 (0.242)      |
|                         | Lt. calcarine fissure and surrounding cortex | 0.47 ± 0.08                                                     | 0.460 (0.031)*                            | 0.020 (0.931)   | 0.013 (0.956)      |
|                         | Rt. lingual gyrus                            | 0.39 ± 0.08                                                     | 0.451 (0.035)*                            | 0.002 (0.995)   | 0.189 (0.400)      |
| Thalamic nuclei         | Rt. anteroventral nucleus                    | 0.50 ± 0.18                                                     | -0.165 (0.462)                            | 0.448 (0.037)*  | 0.213 (0.340)      |
|                         | Lt. anteroventral nucleus                    | 0.52 ± 0.20                                                     | -0.548 (0.008)**                          | 0.211 (0.347)   | -0.011 (0.961)     |
|                         | Lt. ventral anterior                         | 0.12 ± 0.07                                                     | -0.443 (0.039)*                           | 0.342 (0.119)   | -0.167 (0.457)     |
|                         | Lt. intralaminar                             | 0.29 ± 0.13                                                     | -0.243 (0.275)                            | -0.469 (0.028)* | -0.502 (0.017)*    |
| Subcortical gray nuclei | Rt. red nucleus <sup>†</sup>                 | 0.16 ± 0.13                                                     | 0.557 (0.009)**                           | -0.215 (0.349)  | -0.056 (0.809)     |

Correlation coefficients and *p* values were computed using partial correlation analysis with age and sex as covariates, and the statistical significance is presented as *p* < 0.05\* and *p* < 0.01\*\*. <sup>†</sup>[<sup>11</sup>C]DASB BP<sub>ND</sub> values in the right red nucleus were obtained from 23 healthy controls in the process of calculating these values using the SRTM2. BP<sub>ND</sub>, binding potential; ROI, region of interest; SD, standard deviation; Rt, right; Lt, left; SRTM2, simplified reference tissue model 2.

**Supplementary Table S4.** Significant correlations between the character traits and [<sup>11</sup>C]DASB BP<sub>ND</sub> in ROIs for males and females separately

| Sex                | Brain region                                   | [ <sup>11</sup> C]DASB<br>BP <sub>ND</sub> value<br>(Mean ± SD) | Correlation coefficient ( <i>p</i> value) |                 |                    |
|--------------------|------------------------------------------------|-----------------------------------------------------------------|-------------------------------------------|-----------------|--------------------|
|                    |                                                |                                                                 | Self-directedness                         | Cooperativeness | Self-transcendence |
| Male<br>(n = 12)   | Rt. superior temporal gyrus                    | 0.35 ± 0.03                                                     | -0.296 (0.377)                            | 0.407 (0.215)   | -0.707 (0.015)*    |
|                    | Rt. middle temporal gyrus                      | 0.31 ± 0.04                                                     | -0.224 (0.508)                            | 0.381 (0.247)   | -0.619 (0.042)*    |
|                    | Rt. inferior temporal gyrus                    | 0.36 ± 0.05                                                     | -0.130 (0.704)                            | -0.330 (0.322)  | -0.611 (0.046)*    |
| Female<br>(n = 12) | Lt. superior frontal gyrus<br>(medial orbital) | 0.23 ± 0.03                                                     | 0.609 (0.047)*                            | -0.026 (0.939)  | 0.114 (0.738)      |
|                    | Lt. olfactory cortex                           | 0.94 ± 0.14                                                     | 0.615 (0.044)*                            | 0.033 (0.923)   | -0.110 (0.747)     |
|                    | Lt. superior parietal gyrus                    | 0.23 ± 0.05                                                     | 0.663 (0.026)*                            | 0.362 (0.274)   | 0.289 (0.389)      |
|                    | Lt. inferior parietal gyrus                    | 0.31 ± 0.06                                                     | 0.681 (0.021)*                            | 0.295 (0.379)   | 0.193 (0.570)      |
|                    | Lt. hippocampus                                | 0.89 ± 0.16                                                     | 0.626 (0.039)*                            | 0.251 (0.456)   | -0.197 (0.561)     |
|                    | Rt. Amygdala                                   | 1.38 ± 0.23                                                     | 0.626 (0.039)*                            | -0.032 (0.926)  | -0.047 (0.891)     |

Correlation coefficients and *p* values were obtained using partial correlation analysis with age as a covariate. Asterisks indicate statistical significance at *p* < 0.05. BP<sub>ND</sub>, binding potential; ROI, region of interest; SD, standard deviation; Rt, right; Lt, left.

### *The relationship between the harm avoidance temperament and the 5-HTT availability in 52 a priori ROIs*

The Temperament and Character Inventory was used to assess the harm avoidance temperament in 24 healthy subjects (12 males and 12 females). Based on a previous PET study [1], [<sup>11</sup>C]DASB BP<sub>ND</sub> values were obtained in 52 *a priori* ROIs involved in the serotonergic system. Based on several studies demonstrating age and sex effects on 5-HTT binding [2,3], a supplementary ROI-based partial correlation analysis with age and sex as covariates was performed using the Statistical Package for the Social Sciences (SPSS) v28.0 (IBM Corp., Armonk, NY, USA) to examine the relationship between the harm avoidance temperament and [<sup>11</sup>C]DASB BP<sub>ND</sub> in ROIs. Significant results were identified at a threshold of two-tailed  $p < 0.05$ .

The mean raw score for the harm avoidance temperament was  $28.1 \pm 7.1$ . The raw score of the harm avoidance temperament was not significantly correlated with age ( $r = 0.25$ ,  $p > 0.05$ ), and there was no significant difference in the harm avoidance temperament between males and females ( $t = -1.63$ ,  $p > 0.05$ ). The supplementary ROI-based analysis revealed that the harm avoidance temperament was significantly negatively correlated with [<sup>11</sup>C]DASB BP<sub>ND</sub> in the left posterior cingulate gyrus ( $r = -0.468$ ,  $p = 0.028$ ) (Supplementary Figure S1).

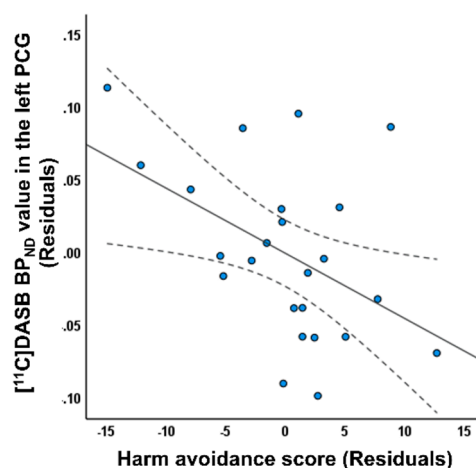

**Supplementary Figure S1.** Scatter plot showing a negative correlation between the raw score of the harm avoidance temperament and [<sup>11</sup>C]DASB BP<sub>ND</sub> in the left posterior cingulate gyrus controlling for age and sex ( $r = -0.468$ ,  $p = 0.028$ ). The solid and dotted lines represent the regression lines and 95% confidence intervals, respectively. BP<sub>ND</sub>, binding potential; PCG, posterior cingulate gyrus.

### **[References]**

1. Kim, J. H.; Kim, J. H.; Son, Y. D.; Joo, Y. H.; Lee, S. Y.; Kim, H. K.; Woo, M. K. Altered interregional correlations between serotonin transporter availability and cerebral glucose metabolism in schizophrenia: A high-resolution PET study using [C-11]DASB and [F-18]FDG. *Schizophr Res* **2017**, 182, 55-65. DOI: 10.1016/j.schres.2016.10.020.

2. van Dyck, C. H.; Malison, R. T.; Seibyl, J. P.; Laruelle, M.; Klumpp, H.; Zoghbi, S. S.; Baldwin, R. M.; Innis, R. B. Age-related decline in central serotonin transporter availability with [I-123]beta-CIT SPECT. *Neurobiol Aging* **2000**, 21 (4), 497-501. DOI: 10.1016/S0197-4580(00)00152-4.
3. Jovanovic, H.; Lundberg, J.; Karlsson, P.; Cerin, A.; Saijo, T.; Varrone, A.; Halldin, C.; Nordstrom, A. L. Sex differences in the serotonin 1A receptor and serotonin transporter binding in the human brain measured by PET. *Neuroimage* **2008**, 39 (3), 1408-1419. DOI: 10.1016/j.neuroimage.2007.10.016.
